# Supplementary material for: Global burden, risk factors, clinicopathological characteristics, molecular biomarkers and outcomes of microsatellite instability-high gastric cancer
Source: publisher site journal article supplement (doi:10.18632/aging.205431), 2024-01-12
Supplement: Supplementary file [file aging-v16i1-205431-supplementary-material-SD1.pdf]

# SUPPLEMENTARY FIGURES

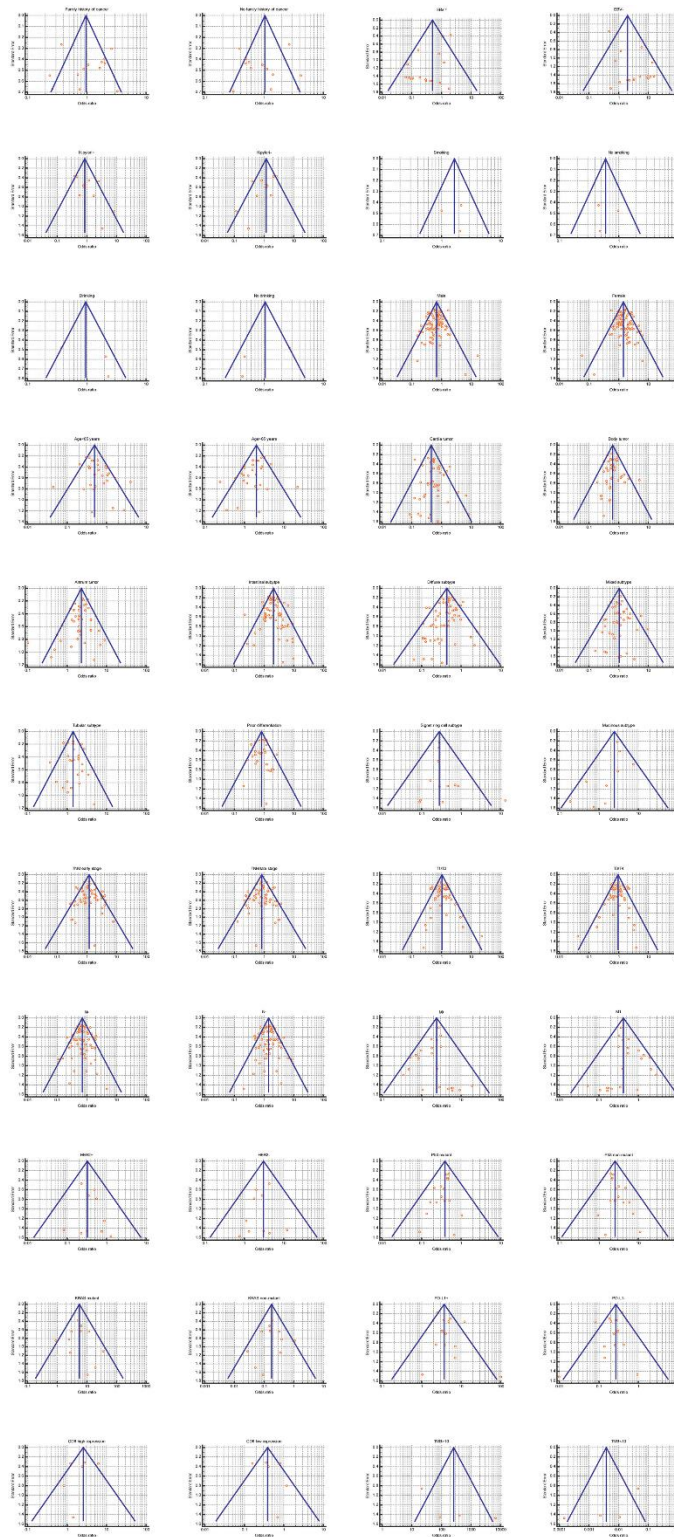

Supplementary Figure 1. Begg's funnel plot of eligible trials to evaluate the potential publication bias.
